# 1 Legacy Data Confounds Genomics 2 Studies

3 **Luke Anderson-Trocmé<sup>1,2</sup>, Rick Farouni<sup>1,2</sup>, Mathieu Bourgey<sup>1,2</sup>, Yoichiro  
4 Kamatani<sup>3</sup>, Koichiro Higasa<sup>3</sup>, Jeong-Sun Seo<sup>4,5</sup>, Changhoon Kim<sup>4</sup>, Fumihiko  
5 Matsuda<sup>3</sup>, Simon Gravel<sup>1,2</sup>**

\*For correspondence:  
[simon.gravel@mcgill.ca](mailto:simon.gravel@mcgill.ca) (SG)

6 <sup>1</sup>Department of Human Genetics, McGill University, Montreal, QC H3A 0G1, Canada;  
7 <sup>2</sup>McGill University and Genome Quebec Innovation Centre, Montreal, QC H3A 0G1,  
8 Canada; <sup>3</sup>Center for Genomic Medicine, Graduate School of Medicine, Kyoto University,  
9 Kyoto 606-8501, Japan; <sup>4</sup>Bioinformatics Institute, Macrogen Inc., Seoul, 08511, Republic of  
10 Korea; <sup>5</sup>Precision Medicine Center, Seoul National University Bundang Hospital,  
11 Seongnam, 13605, Republic of Korea

---

13 **Abstract** Recent reports have identified differences in the mutational spectra across human  
14 populations. While some of these reports have been replicated in other cohorts, most have been  
15 reported only in the 1000 Genomes Project (1kGP) data. While investigating an intriguing putative  
16 population stratification within the Japanese population, we identified a previously unreported  
17 batch effect leading to spurious mutation calls in the 1kGP data and to the apparent population  
18 stratification. Because the 1kGP data is used extensively, we find that the batch effects also lead to  
19 incorrect imputation by leading imputation servers and suspicious GWAS associations.  
20 Lower-quality data from the early phases of the 1kGP thus continues to contaminate modern  
21 studies in hidden ways. It may be time to retire or upgrade such legacy sequencing data.

22 **Key words** : Batch Effect, Mutational Signature, Statistical Genetics, Population Genetics, Reference  
23 Cohorts, Imputation

---

## 25 Introduction

### 26 Batch Effects in Aging Reference Cohort Data

27 The last 5 years have seen a drastic increase in the amount and quality of human genome sequence  
28 data. Reference cohorts such as the International HapMap Project (*International HapMap Con-  
29 sortium, 2005*), the 1000 Genomes Project (1kGP) (*1000 Genomes Project Consortium, 2010, 2012;  
30 Consortium et al., 2015*), and the Simons Diversity project (*Mallick et al., 2016*), for example, have  
31 made thousands of genome sequences publicly available for population and medical genetic analy-  
32 ses. Many more genomes are available indirectly through servers providing imputation services  
33 (*McCarthy et al., 2016*) or summary statistics for variant frequency estimation (*Lek et al., 2016*).

34 The first genomes in the 1kGP were sequenced 10 years ago (*van Dijk et al., 2014*). Since  
35 then, sequencing platforms have rapidly improved. The second phase of the 1kGP implemented  
36 multiple technological and analytical improvements over its earlier phases (*1000 Genomes Project  
37 Consortium, 2012; Consortium et al., 2015*), leading to heterogeneous sample preparations and  
38 data quality over the course of the project.

39 Yet, because of the extraordinary value of freely available data, early data from the 1kGP is still  
40 widely used to impute untyped variants, to estimate allele frequencies, and to answer a wide range

41 of medical and evolutionary questions. This raises the question of whether and how such legacy  
42 data should be included in contemporary analyses alongside more recent cohorts. Here we point  
43 out how large and previously unreported batch effects in the early phases of the 1kGP still lead to  
44 incorrect genetic conclusions through population genetic analyses and spurious GWAS associations  
45 as a result of imputation using the 1kGP as a reference.

## 46 **Mutational Signatures**

47 Different mutagenic processes may preferentially affect different DNA motifs. Certain mutagens  
48 in tobacco smoke, for example, have been shown to preferentially bind to certain genomic motifs  
49 leading to an excess of G to T transversions (*Pfeifer et al., 2002; Pleasance et al., 2010*). Thus,  
50 exposure of populations to different mutational processes can be inferred by considering the DNA  
51 context of polymorphism in search of *signatures* of different mutational processes (*Alexandrov*  
52 *et al., 2013; Shiraishi et al., 2015*). Such genome-wide mutational signatures have been used as  
53 diagnostic tools for cancers (e.g., *Alexandrov et al. (2013); Shiraishi et al. (2015)*).

54 In addition to somatic mutational signatures, there has been recent interest in population  
55 variation in germline mutational signatures which can be revealed in large sequencing panels.  
56 In 2015, Harris reported 50% more TCC → TTC mutations in European populations compared  
57 to African populations, and this was replicated in a different cohort in 2017 (*Harris, 2015; Harris*  
58 *and Pritchard, 2017; Mathieson and Reich, 2017*). Strong population enrichments of a mutational  
59 signature suggests important genetic or environmental differences in the history of each population  
60 (*Harris, 2015; Harris and Pritchard, 2017*). Harris and Pritchard further identified distinct mutational  
61 spectra across a range of populations, which were further examined in a recent publication by  
62 Aikens et al. (*Harris and Pritchard, 2017; Aikens et al., 2019*).

63 In particular, the latter two studies identified a heterogeneous mutational signature within 1kGP  
64 Japanese individuals. This heterogeneity is intriguing because differences in germline signatures  
65 accumulate over many generations. A systematic difference within the Japanese population would  
66 suggest sustained environmental or genetic differences across sub-populations within Japan with  
67 little to no gene flow. We therefore decided to follow up on this observation, by using a newly  
68 sequenced dataset of Japanese individuals from Nagahama.

69 While we were unable to reproduce the mutational heterogeneity within the Japanese population,  
70 we could trace back the source of the discrepancy to a technical artefact in the 1kGP data. In addition  
71 to creating biases in mutational signatures, this artefact leads to spurious imputation results which  
72 have found their way in a number of recent publications.

73 The results section is organized as follows. We first attempt to reproduce the original signal and  
74 identify problematic variants in the JPT cohort from the 1kGP. Next, we expand our analysis to the  
75 other populations in the 1kGP and identify lists of variants that show evidence for technical bias.  
76 Finally, we investigate how these variants have impacted modern genomics analyses.

## 77 **Results**

### 78 **A peculiar mutational signature in Japan**

79 Harris and Pritchard reported an excess of a 3-mer substitution patterns \*AC→\*CC in a portion  
80 of the Japanese individuals in the 1kGP (*Harris and Pritchard, 2017*). While trying to follow up on  
81 this observation in a larger and more recent Japanese cohort from Nagahama, we did not find this  
82 particular signature. When comparing the allele frequencies between the Japanese individuals from  
83 the 1kGP and this larger dataset, we observed a number of single nucleotide polymorphisms (SNPs)  
84 private to one of the two groups (Figure 1). Given the similarity of the two populations, this strongly  
85 suggests a technical difference rather than a population structure effect. These mismatches were  
86 maintained despite only considering sites that satisfied strict quality masks and Hardy-Weinberg  
87 equilibrium in both cohorts.

88 When mismatch sites are removed from the 1kGP data, the \*AC→\*CC signal disappears (Figure

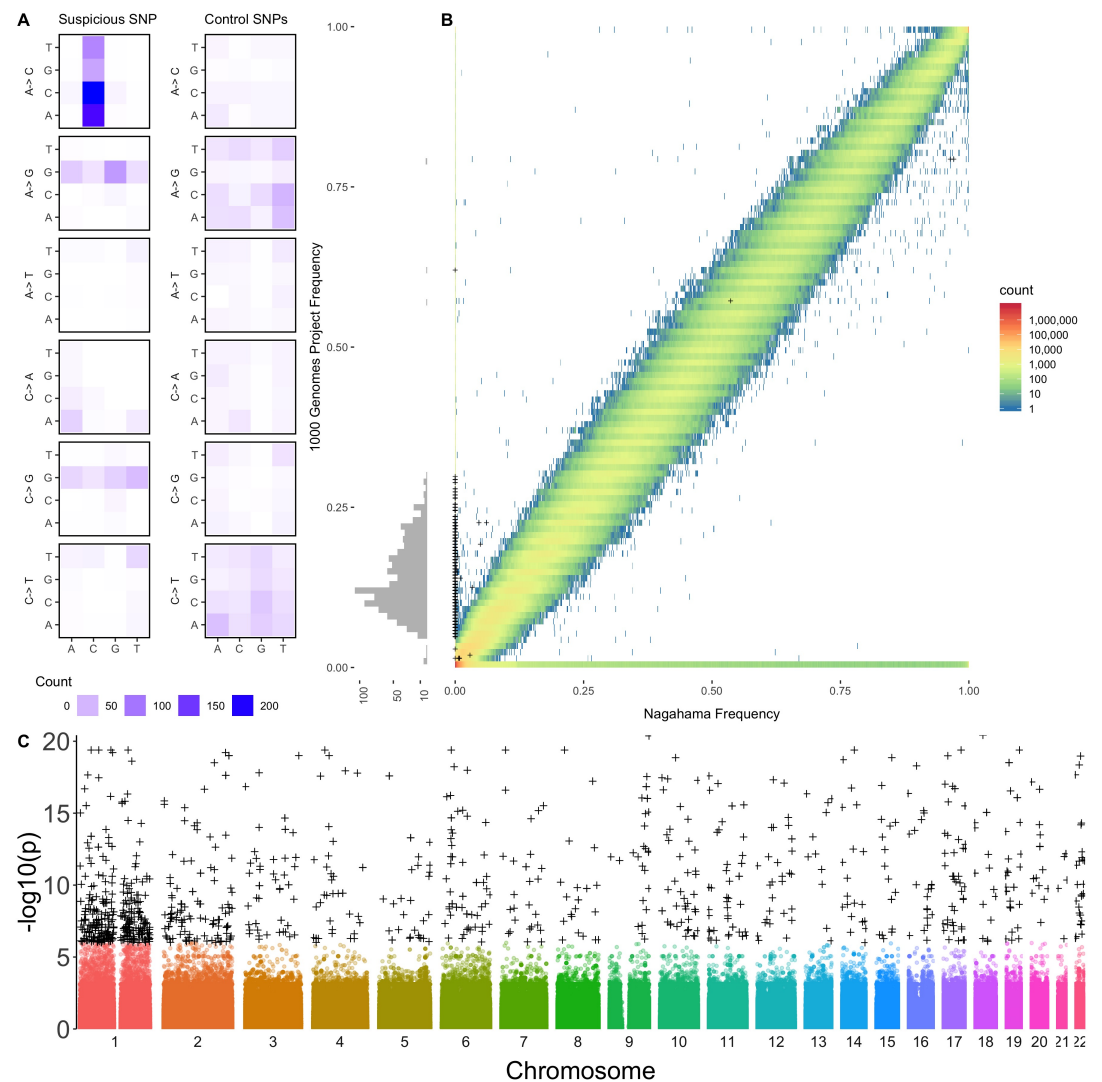

**Figure 1.** Suspicious mutations carried by individuals with low quality data have distinct mutational profiles, reproduce poorly across studies, and are distributed across the genome. **A** Mutation spectrum of the 1034 variants that associated with  $Q$  in the JPT ( $p < 10^{-6}$ ), compared to a random set of SNPs. The majority of the variants with significant associations to  $Q$  have the  $*AC \rightarrow *CC$  mutational pattern. There is also a slight enrichment in  $GA^* \rightarrow GG^*$  and  $GC^* \rightarrow GG^*$  mutations. These three enrichments can be summarized as  $G^{**} \rightarrow GG^*$ . **B** Joint frequency spectrum plot of the Japanese from the 1000 Genomes Project and a more recent Japanese dataset from Nagahama. Crosses (+) are variants that associate with  $Q$  in the JPT. The histogram on the left of the plot is the distribution of significant variants. **C** Genome wide association of the average quality of mapped bases  $Q$  for the 104 Japanese individuals included in the 1000 Genomes Project. This GWAS identified 587  $p < 10^{-8}$  and 1034  $p < 10^{-6}$  SNPs that were associated to the average  $Q$  of SNPs mapped for an individual. The same analysis was performed independently for each of the populations in the 1000 Genomes Project.

89 1). To identify possible technical reasons for the difference, we performed regressions of the  
90 prevalence of the \*AC→\*CC mutational signature against different individual-level quality metrics  
91 provided by the 1kGP (see Figure S14). The average quality of mapped bases  $Q$  per individual  
92 stood out as a strong correlate: Individuals with low  $Q$  show elevated rates of the signature. Thus,  
93 sequences called from low- $Q$  data contain variants that reproduce poorly across studies and exhibit  
94 a particular mutational signature.

95 To identify SNPs that are likely to reproduce poorly across cohorts without having access to a  
96 second cohort, we performed an association study in the JPT for SNPs that associate strongly with  
97 low  $Q$  (Figure 1). Traditionally, genome wide association studies use genotypes as the independent  
98 variable. Here we perform a “reverse GWAS”, in the sense that genotypes are now the dependent  
99 variable that we attempt to predict using the continuous variable  $Q$  as the independent variable  
100 (Song *et al.*, 2015). We use logistic regression of the genotypes on  $Q$  and identify 587 SNPs with  
101  $p < 10^{-8}$  and 1034 SNPs with  $p < 10^{-6}$ . While identifying putative low-quality SNPs to exclude, using  
102 a higher  $p$ -value threshold increases the stringency of the filtering (i.e., excluding SNPs with  $p < 10^{-6}$   
103 is more stringent than excluding SNPs with  $p < 10^{-8}$ ). The variants that are associated to  $Q$  have an  
104 enrichment in \*AC→\*CC mutations, GA\*→GG\*, and GC\*→GG\* mutations (Figure 1A). These three  
105 enrichments can be summarized as an excess of G\*\*→GG\* in individuals with low  $Q$ .

106 Thus, this mutational signal is heavily enriched in  $Q$ -associated SNPs, but residual signal remains  
107 in non-significant SNPs, presumably because many rare alleles found in individuals with low  $Q$   
108 remain unidentifiable using association techniques (Figure S15). The removal of individuals with  
109  $Q$  below 30 successfully removes the \*AC→\*CC signal, however other signals identified by Harris  
110 and Pritchard appear unchanged (Figure S15). For population genetic analyses sensitive to the  
111 accumulation of rare variants, the removal of individuals with low  $Q$  appears preferable to filtering  
112 specific low-quality SNPs. For other analyses where quality of imputation matters, identifying  
113  $Q$ -associated variants may be preferable.

#### 114 **Identifying suspicious variants in the 1000 Genomes Project**

115 The distribution of  $Q$  across 1kGP populations shows that many populations have distributions  
116 of  $Q$  scores comparable to that of the JPT, especially populations sequenced in the phase 1 of the  
117 project: sequencing done in the early phases of the 1kGP was more variable and overall tended to  
118 include lower quality sequencing data (Figure 2). This variability could result from evolving sequence  
119 platform and protocols or variation between sequencing centres. By 2011, older sequencing  
120 technologies were phased out, and methods became more consistent, resulting in higher and more  
121 uniform quality.

122 We therefore performed the same reverse GWAS approach in all populations independently,  
123 and similarly identified  $Q$ -associated SNPs in 23 of the 26 populations in the 1kGP, with the phase 1  
124 populations being most affected, with on average four times as many significantly associated sites  
125 compared to the phase 3 populations. Over 812 variants were independently associated to low  $Q$   
126 in at least two populations with  $p < 10^{-6}$  in each (Figure 3).

127 To build a test statistic to represent the association across all populations simultaneously, we  
128 performed a simple logistic regression predicting genotype based on  $Q$  with the logistic factor  
129 analysis (LFA) as an offset to account for population structure or Genotype-Conditional Association  
130 Test (GCAT) as proposed by (Song *et al.*, 2015). We also considered two alternative approaches to  
131 account for confounders, namely using the leading five principal components, and using population  
132 membership as covariates. These models were broadly consistent (See Figure S1).

133 This method identifies a total of 24,390 variants associated to  $Q$  distributed across the genome  
134 with 15,270 passing the 1kGP strict mask filter (Figures S9,S10, S11, and S12). Most analyses below  
135 focus on the 15,270 variants satisfying the strict mask, since these variants are unlikely to be filtered  
136 by standard pipelines. To account for the large number of tests, we used a two-stage Benjamini &  
137 Hochberg step-up FDR-controlling procedure to adjust the  $p$ -values using a nominal Type-I error  
138 rate  $\alpha = 0.01$  (Benjamini *et al.*, 2006). We tested SNPs, INDELS and repetitive regions separately as

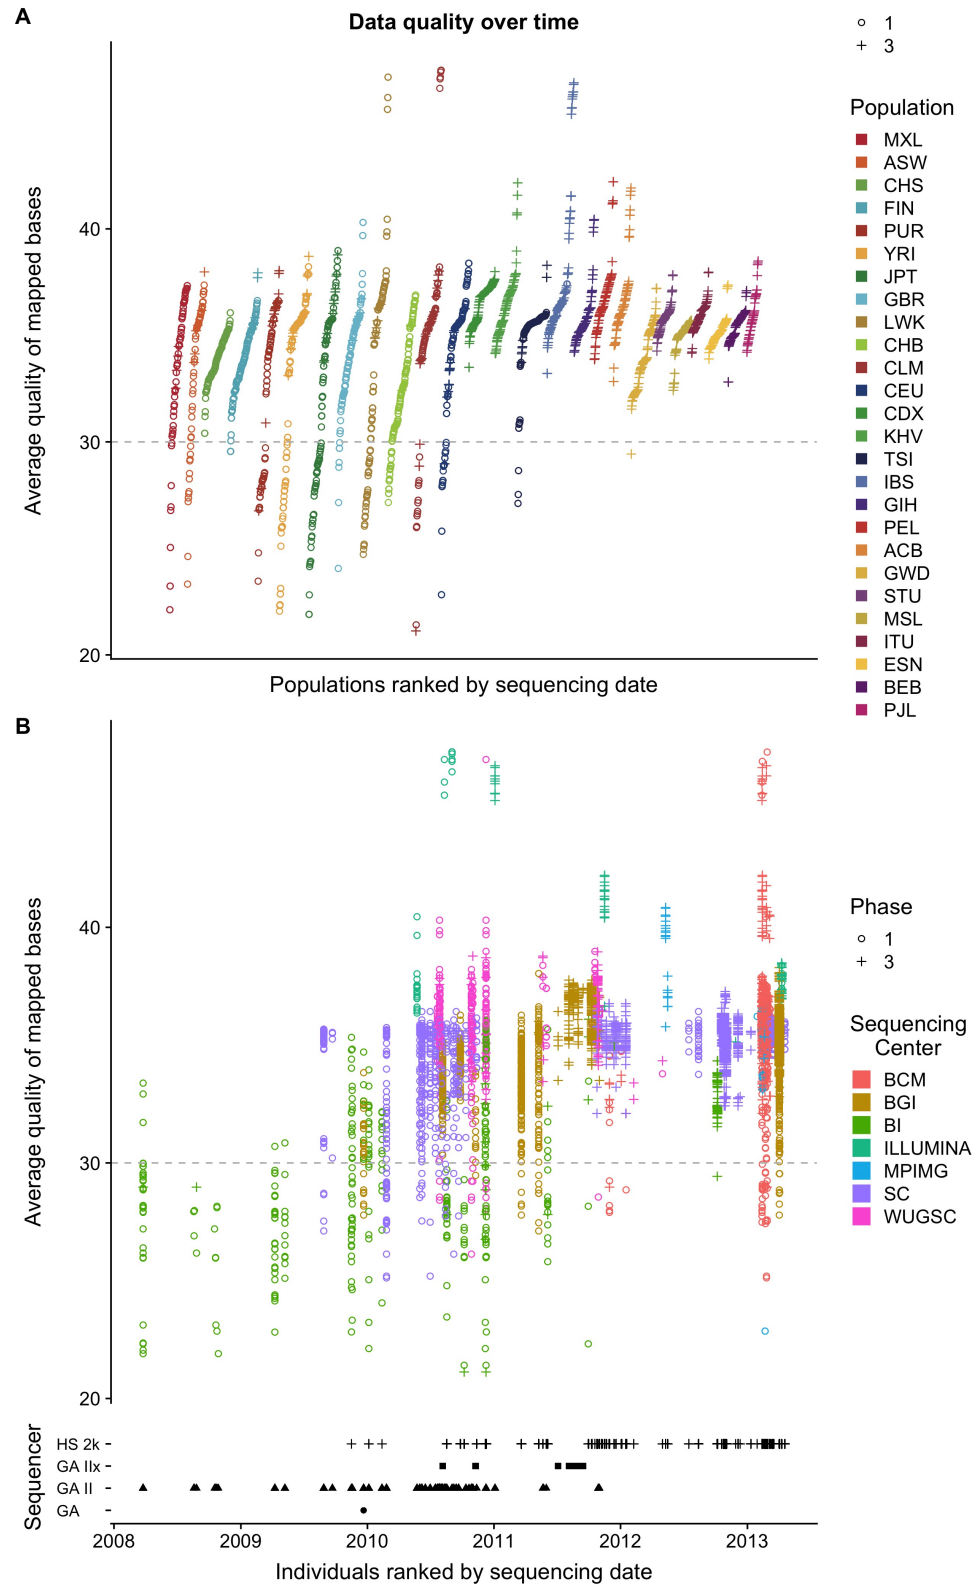

**Figure 2.** Sampling and sequencing technologies over time in the 1000 Genomes Project. **A** The average quality of mapped bases  $Q$  for each individual per population included in the 1000 Genomes Project. Populations are ranked by mean sequencing date (the earliest sequencing date was used for individuals with multiple dates). **B** The x-axis is sorted by the sequencing date per individual. The colours indicate the sequencing centres that produced the data for each individual and the shape indicates whether the individual belongs to Phase 1 or Phase 3 of the 1000 Genomes project. The bottom plot indicates the sequencing technologies used over time.

139 they may have different error rates (Table 1). Lists of  $Q$ -associated variants and individuals with low  
140  $Q$  are provided in Supplementary Data.

141  $Q$ -associated variants are distributed across the genome, with chromosome 1 showing an excess  
142 of such variants, and other chromosomes being relatively uniform (Figure S2). At a 10kb scale, we  
143 also see rather uniform distribution with a small number of regions showing an enrichment for such  
144 variants (Figure S3). An outlying 10kb region in chromosome 17 (bases : 22,020,000 to 22,030,000)  
145 has 35  $Q$ -associated variants. Distribution of association statistics in this region is provided in Figure  
146 S4. By contrast, variants that do not pass the 1kGP strict mask are more unevenly distributed across  
147 the genome(Figure S3).

|       | Repeat | Non-Repeat | Total  |
|-------|--------|------------|--------|
| SNP   | 3,369  | 11,059     | 14,428 |
| INDEL | 181    | 657        | 838    |
| Total | 3,550  | 11,716     | 15,270 |

**Table 1.** Number of statistically significant variants passing the 1000 Genomes Project strict mask per category. Variants that are flagged by the 1000 Genomes Project nested repeat mask file were analyzed separately for FDR calculation. SNPs and INDELS were also analyzed separately. A total of 15,270 are statistically significantly associated to  $Q$ . The number of variants included in the analysis for SNPs, SNPs in repeat regions, INDELS and INDELS in repeat regions are 19,846,786, 6,312,620, 1,770,315 and 586,342 respectively.

#### 148 **Cell line or technical artifact**

149 In 2017, Lan et al. resequenced 83 Han Chinese individuals from the 1kGP (Lan et al., 2017). To  
150 assess consistency between the two datasets, we consider consistency of genotype calls for  $Q$ -  
151 associated variants that are predicted to be polymorphic in these 83 individuals according to the  
152 1kGP. Among the 296 such variants that were  $Q$ -associated in the CHB or CHS, only 6 are present  
153 in the resequenced data (Figure S7). This is more than our nominal false positive rate of 1% of  
154 the sites. Thus a small number of variants associated to  $Q$  are present in the population but with  
155 somewhat biased genotypes.

156 We did a similar analysis using all variants identified in the GCAT model (rather than only  
157 variants significantly associated to  $Q$  within the CHB and CHS). Of the 15,270  $Q$ -associated variants  
158 identified globally, 6,307 are polymorphic in the 1kGP for the 83 resequenced individuals (See  
159 Figure S5). From this subset, only 1,139 (or 18%) are present in the resequenced data. The allele  
160 frequencies of these variants are nearly identical between datasets suggesting that among these  
161 83 individuals, these variants are properly genotyped in the 1kGP. There are 5 alleles that show  
162 differing frequencies between both datasets that are likely explained by biased genotypes. The vast  
163 majority of polymorphisms associated with  $Q$  are not present at all in the resequencing dataset,  
164 supporting sequencing rather than cell line artifacts.

165 Among the 15,270  $Q$ -associated variants, 613 are present on Illumina's Omni 2.5 chip (See Figure  
166 S13). These are likely among the small number of variants that are present in the data but exhibit  
167 biased genotyping in 1kGP.

#### 168 **Suspicious variants impact modern genomics analyses**

169 State of the art imputation servers use a combination of many databases including some that  
170 are not freely available. From the perspective of researchers, they act as black-box imputation  
171 machines that take observed genotypes as input and return imputed genotypes.

172 To investigate whether suspicious calls from the 1kGP are imputed into genotyping studies, we  
173 submitted genotype data for the first two chromosomes of the 1kGP genotype data to the Michigan  
174 Imputation Server. We found that all of the variants associated with  $Q$  were imputed back in the  
175 samples. This suggests that the imputation reference panel still includes individuals with low  $Q$ ,

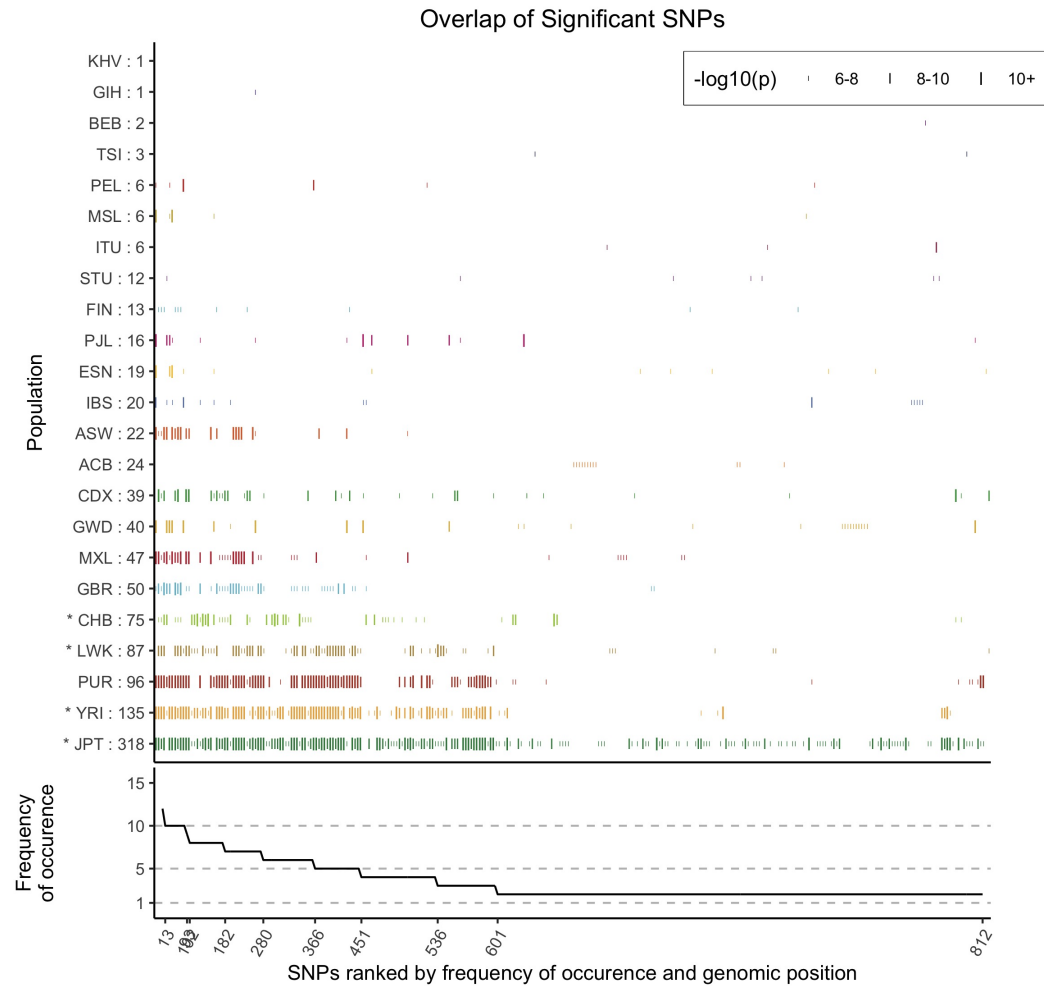

**Figure 3.** Variants associated with average quality of mapped bases  $Q$  in more than one population. The size of the vertical bars (|) are proportional to the  $-\log_{10}(p)$  value of that SNP. The x axis is ranked by the frequency of occurrence of a SNP, then by genomic position. Phase 1 populations are marked by a star (\*). The line plot underneath shows the number of populations for which a variant has reached significance. The populations that tend to have the most individuals with low  $Q$  also tend to have the most variants associated to  $Q$ .

176 and the dubious variants will be imputed in individuals who most closely match the low-quality  
177 individual.

178 We searched the literature for any GWAS that might have reported these dubious variants as  
179 being significantly associated with some biological trait, even though there is no particular reason  
180 for these variants to be associated with phenotypes. The NHGRI-EBI Catalog of published genome-  
181 wide association studies identified seventeen recent publications that had reported these variants  
182 as close to or above the genome-wide significant threshold (Table 2).

183 Eleven of these studies included the 1kGP in their reference panel for imputation (*Xu et al.,*  
184 *2012; Lutz et al., 2015; Park et al., 2015; Astle et al., 2016; Herold et al., 2016; Suhre et al., 2017;*  
185 *López-Mejías et al., 2017; Tian et al., 2017; Spracklen et al., 2017; Nagy et al., 2017; Gao et al.,*  
186 *2018*) and another used the 1kGP sequence data and cell lines directly (*Mandage et al., 2017*). One  
187 study used an in-house reference panel for imputation (*Nishida et al., 2018*), two studies genotyped  
188 individuals and imputed the data using the HapMap II as a reference database for imputation (*Kraja*  
189 *et al., 2011; Ebejer et al., 2013*) and two studies used genotyping chip data (*Yucesoy et al., 2015;*  
190 *Ellinghaus et al., 2016*).

191 These articles used a variety of strict quality filters, including Hardy-Weinberg equilibrium test,  
192 deviations in expected allele frequency and sequencing data quality thresholds. They also removed  
193 rare alleles and alleles with high degrees of missingness. Despite using state-of-the-art quality  
194 controls, these variants managed not only to be imputed onto real genotype data, but they also  
195 reached genome wide significance for association with biological traits.

196 These associations are not necessarily incorrect – a weak but significant bias in imputation  
197 may still result in a correct associations. To distinguish between variants with weak but significant  
198 association with  $Q$  from variants with strong biases, we distinguished between variants where  
199 the allele frequency difference between individuals with low- and high- $Q$  is larger than a factor of  
200 two (which naturally separates two clusters of variants on Figure S5). The majority (92.7%) of the  
201  $Q$ -associated variants are strongly biased in that they are more than twice as frequent in individuals  
202 with low- $Q$  compared to high- $Q$  data. By contrast, most  $Q$ -associated variants reported in the GWAS  
203 catalogue had weak bias (See Figure S6), with three exceptions. One study reports associations  
204 with seven  $Q$ -associated variants that we find to be highly biased (*Mandage et al., 2017*). That study  
205 considered copy number of Epstein-Barr virus sequence in the 1kGP as a phenotype. Thus the  
206 phenotype in that study is likely confounded by the same technical artefacts that lead to biased  
207 SNP calling.

## 208 Discussion

209 The variants identified in this study are likely to be technical artifacts from legacy technologies.  
210 Different sequencing technologies will have different error profiles. A report comparing the Genome  
211 Analyzer II (GAII) to the Illumina HiSeq found that the GAII had much higher rates of reads below a  
212 quality score of 30 (*Minoche et al., 2011*) with, for instance, different patterns of quality decrease  
213 along reads. Differences in read quality and error profiles in turn require different calling pipelines.

214 To pinpoint the precise technical source of the discrepancy would require further forensic  
215 inquiries into the details of the heterogeneous sample preparation and data processing pipelines  
216 used throughout the 1kGP. Given the progress in sequencing and calling that occurred since the  
217 early phases of the 1kGP (Figure 2), it is likely that the source of these biases is not longer being  
218 actively introduced in recent sequence data.

219 However, because the 1kGP data is widely used as a reference database, these variants are  
220 still being imputed onto new genotype data and can then impact association studies for a variety  
221 of phenotypes. Even though significant association of a variant with a quality metric is not in  
222 itself an indication that the variant is spurious, we would recommend to carefully examine GWAS  
223 associations for such variants, e.g. by repeating the analysis without the 1kGP as part of the  
224 imputation panel.



| Pubmed ID | Journal                             | rsID        | GWAS<br>$-\log_{10} p$ | $Q$<br>$-\log_{10} p$<br>(adjusted) |
|-----------|-------------------------------------|-------------|------------------------|-------------------------------------|
| 28654678  | PLoS One                            | rs201761909 | 5.7                    | 78.11                               |
|           |                                     | rs201130852 | 5.05                   | 72.28                               |
|           |                                     | rs201255786 | 5.7                    | 68.97                               |
|           |                                     | rs200655768 | 6.52                   | 66.67                               |
|           |                                     | rs184202621 | 5.52                   | 60.45                               |
|           |                                     | rs80274284  | 6                      | 56.15                               |
| 23527680  | Twin Research and<br>Human Genetics | rs200699422 | 5.3                    | 7.43                                |
|           |                                     | rs6057648   | 5.4                    | 20.5                                |
| 28928442  | Nature<br>Communications            | rs201471471 | 6.52                   | 7.87                                |
| 26053186  | PLoS One                            | rs60136336  | 5.7                    | 2.25                                |
| 28270201  | Genome Medicine                     | rs453755    | 7.52                   | 5.29                                |
| 23023329  | Nature Genetics                     | rs103294    | *15.3                  | 4.32                                |
| 28334899  | Human Molecular<br>Genetics         | rs103294    | *29.3                  | 4.32                                |
| 28240269  | Nature<br>Communications            | rs103294    | *72.7                  | 4.32                                |
| 27863252  | Cell                                | rs3794738   | *13.15                 | 3.73                                |
| 29534301  | Hepatology                          | rs9273062   | *9.7                   | 3.36                                |
| 21386085  | Diabetes                            | rs301       | *10.52                 | 3.02                                |
| 26830138  | Molecular Psychiatry                | rs77894924  | 6.7                    | 2.77                                |
| 29617998  | Human Molecular<br>Genetics         | rs4963156   | *22.4                  | 2.52                                |
| 28698626  | Scientific Reports                  | rs11015915  | 5.05                   | 2.45                                |
| 26974007  | Nature Genetics                     | rs3124998   | *8.05                  | 2.33                                |
| 26634245  | BMC Genetics                        | rs451000    | 6                      | 2.28                                |
|           |                                     | rs443874    | 5.3                    | 2.26                                |
|           |                                     | rs400942    | 6                      | 2.2                                 |
| 25918132  | Toxicological<br>Sciences           | rs76780579  | 6                      | 2.09                                |

**Table 2.** Recent publications that reported  $Q$ -associated variants as close to or above the genome-wide significant threshold. The variants reaching genome wide significance have a star (\*). The black text colour indicates that this variant is twice as frequent in individuals with  $Q < 30$ , grey text colour indicates that these variants are less than twice as frequent in individuals with  $Q < 30$  (See Figure S6).

225 For analyses where individual variants cannot be examined individually (mutation profiles,  
226 distributions of allele frequencies, polygenic risk scores), we would recommend to simply discard the  
227  $Q$ -associated SNPs or the individuals with  $Q < 30$  (lists of such variants and sample IDs are provided  
228 in the Supplementary Data). We also recommend that imputation servers discard individuals with  
229 low  $Q$  (or at least provide the option of performing the imputation without). Given the value of freely  
230 accessible data, resequencing individuals with low  $Q$  would also likely be a worthwhile investment  
231 for the community.

## 232 **Conclusion**

233 On a technical front, we were surprised that strong association between variants and technical  
234 covariates in the 1kGP project had not been identified before. The genome-wide logistic regression  
235 analysis of genotype on quality metric is straightforward, and should probably be a standard in  
236 a variety of -omics studies. The logistic factor analysis is more computationally demanding but  
237 produces more robust results (*Song et al., 2015*). Both approaches produce comparable results.

238 More generally, to improve the quality of genomic reference datasets, we can proceed by  
239 addition of new and better data and by better curation of existing data. Given rapid technological  
240 progress, the focus of genomic research is naturally on the data generation side. However, cleaning  
241 up existing databases is also important to avoid generating spurious results. The present findings  
242 suggest that a substantial fraction of data from the final release of the 1kGP project is overdue for  
243 retirement or re-sequencing.

## 244 **Methods**

### 245 **Code and data availability**

246 Since this data is primarily performed using publicly available data, we provide fully reproducible and  
247 publicly available on [GitHub](#). This repository includes scripts used for data download, processing,  
248 analysis and plotting.

### 249 **Metadata**

250 The metadata used in this analysis was compiled from each of the index files from the 1kGP file  
251 system. Average quality of mapped bases  $Q$  per sample was obtained from the BAS files associated  
252 with each alignment file. Each BAS file has metadata regarding each sequencing event for each  
253 sample. If a sample was sequenced more than once, we took the average of each  $Q$  score from  
254 each sequencing instance. The submission dates and sequencing centres for each sample in the  
255 analysis was available in the sequence index files.

### 256 **Quality Controls**

257 For the mutation spectrum analysis, we reproduced the quality control and data filtering pipelines  
258 used by Harris et al. as they applied the current state of the art quality thresholds to remove  
259 questionable sequences for detecting population level differences. Several mask files were applied  
260 to remove regions of the genome that might be lower quality, or might have very different mutation  
261 rates or base pair complexity compared to the rest of the genome. The 1kGP strict mask was used  
262 to remove low quality regions of the genome, highly conserved regions were removed using the  
263 phastCons100way mask file and highly repetitive regions were removed using the NestedRepeats  
264 mask file from RepeatMasker. Furthermore, only sites with missingness below 0.01, MAF less than  
265 0.1, and MAF greater than 0.9 were considered. In total, 7,786,023 diallelic autosomal variants  
266 passed our quality controls for the mutation spectrum analysis. We calculated the mutation  
267 spectrum of base pair triplets for the list of significant variants for the JPT population using a similar  
268 method as described in (*Harris and Pritchard, 2017*).

269 For the reverse GWAS, the only filtration used was the application of an minor and major  
270 allele frequency cutoff of 0.000599 (removing singletons, doubletons and tripletons) resulting in  
271 a total of  $S=28,516,063$  variants included in the test. We also used the NestedRepeats mask file  
272 to flag variants inside repetitive regions as these were analyzed separately for false discovery  
273 rate estimation. Variants flagged by the 1kGP strict mask are included in the association test and  
274 included in the FDR adjustment. These variants are only removed after the FDR and excluded from  
275 downstream discussion of error patterns, since most population genetics analyses use the strict  
276 mask as a filter, and we expect to find problematic variants in filtered regions.

## 277 Testing the association of quality to genotype

When conducting a statistical analysis of population genetics data, we must account for population structure. In a typical GWAS, we are interested in modelling the phenotype as a function of the genotype. Here we have the opposite situation, where the quantitative variable ( $Q$ ) is used as an explanatory variable. So we consider models where the genotype  $y$  is a function of an expected frequency  $\pi_{si}$ , based on population structure, and  $Q$ . The null model is

$$y_{si} | \pi_{si} \sim \text{Binomial}(2, \pi_{si}). \quad (1)$$

278 The expected frequency for a SNP  $s$  and individual  $i$  can be estimated using principal component  
279 analysis, categorical population labels, or logistic factor analysis (*Song et al., 2015*). The alternative  
280 model then takes in  $Q$  as a covariate:

$$y_{si} | q_i, \mathbf{h}^{(i)} \sim \text{Binomial}\left(2, \text{logit}^{-1}\left(\text{logit}(\pi_{si}) + \beta_s q_i\right)\right). \quad (2)$$

281 Under the null hypothesis the slope coefficient  $\beta_s$  is zero and Model (2) reduces to Model (1).  
282  $\beta_s$  denotes the association to average quality of mapped bases  $Q$  to genotype  $y_s$ . To test the null  
283 hypothesis, we use the generalized likelihood ratio test statistic, whose deviance is a measure of  
284 the marginal importance of adding  $Q$  in the model. The deviance test statistic under the null model  
285 is approximately chi-square distributed with one degrees of freedom.

286 We run a total of  $S$  regressions, where  $S$  is the total number of genomic loci. Given the large  
287 number of tests, the large proportion of expected null hypotheses and the positive dependencies  
288 across the genome, we used the two-stage Benjamini & Hochberg step-up FDR-controlling proce-  
289 dure to adjust the  $p$ -values (*Benjamini et al., 2006*). By using a nominal Type-I error rate  $\alpha = 0.01$ , a  
290 total of 15,270 variants were found to be statistically significance. See Supplementary Data for a list  
291 of variants and adjusted  $p$ -values.

## 292 Individual-specific allele frequency

Examples of models that are widely used to account population structure include the Balding-  
Nichols model (*Balding and Nichols, 1995*), and the Pritchard- Stephens-Donnelly model (*Pritchard  
et al., 2000*). These and several other similar models used in GWAS studies can be understood in  
terms of the following matrix factorization.

$$\mathbf{L} = \mathbf{A}\mathbf{H} \quad (3)$$

where the  $i^{\text{th}}$  column ( $\mathbf{h}^{(i)}$ ) of the  $K \times I$  matrix  $\mathbf{H}$  encodes the population structure of the  $i^{\text{th}}$  individual  
and the  $s^{\text{th}}$  row of the  $S \times K$  matrix  $\mathbf{A}$  determines how that structure is manifested in SNP  $s$ . When  
Hardy-Weinberg equilibrium holds, observed genotype can be assumed to be generated by the  
following Binomial model.

$$y_{si} | \pi_{si} \sim \text{Binomial}(2, \pi_{si}) \quad (4)$$

293 for  $s = 1 \dots S$  and  $i = 1, \dots, I$ , where  $y_{si} \in \{0, 1, 2\}$  and  $\text{logit}(\pi_{si})$  is the  $(s, i)$  element of the matrix  $\mathbf{L}$   
294 such that  $\pi_{si}$  is the individual-specific allele frequency.

To test whether quality is associated to genotype while adjusting for population structure, we  
performed the Genotype-Conditional Association Test (GCAT) proposed by (*Song et al., 2015*). The  
GCAT is a regression approach that assumes the following model.

$$y_{si} | q_i, \mathbf{h}^{(i)} \sim \text{Binomial}\left(2, \text{logit}^{-1}\left(\sum_{k=0}^K a_{sk} h_{ki} + \beta_s q_i\right)\right) \quad (5)$$

295 for  $s = 1 \dots S$  and  $i = 1, \dots, I$  ( $S = 28,516,063$  and  $I = 2,504$ ) and where  $\hat{h}_{0i} = 1$  so that  $a_{s0}$  is the  
296 intercept term and  $\text{logit}(\pi_{si}) = \sum_{k=0}^K a_{sk} h_{ki}$ . The vectors  $\mathbf{h}^i$  of the matrix  $\mathbf{H}$  are unobserved but can  
297 be estimated using Logistic Factor Analysis (LFA) (*Song et al., 2015*) and are therefore used directly

298 in the model. We approximated the population structure using  $K = 5$  latent components from a  
299 subsampled genotype matrix consisting of  $M = 2,306,130$  SNPs (we picked SNPs from the 1kGP  
300 OMNI 2.5). To avoid possible biases in computing PCA from the biased variants, we considered the  
301 genotype matrix  $L$  obtained by downsampling 1kGP variants the positions from the OMNI 2.5M  
302 chip.

### 303 Imputation

304 Using the Michigan Imputation Server, we imputed the genotype data from 1kGP for chromosomes  
305 1 and 2. We used the genotyped data from the 1kGP Omni 2.5M chip genotype data. The VCF file  
306 returned from the server was then downloaded and used to search for the number of significant  
307 variants successfully imputed.

### 308 Acknowledgments

309 We would like to thank Kelly Harris for sharing her mutation spectrum scripts. We would also like to  
310 thank the members of the Gravel lab for their help with coding and useful discussions.

### 311 References

- 312 1000 Genomes Project Consortium (2010). A map of human genome variation from population-scale sequencing.  
313 *Nature*, 467(7319):1061–73.
- 314 1000 Genomes Project Consortium (2012). An integrated map of genetic variation. *Nature*, 135:0–9.
- 315 Aikens, R. C., Johnson, K. E., and Voight, B. F. (2019). Signals of Variation in Human Mutation Rate at Multiple  
316 Levels of Sequence Context. *Molecular Biology and Evolution*.
- 317 Alexandrov, L. B., Nik-Zainal, S., Wedge, D. C., Aparicio, S. A., Behjati, S., Biankin, A. V., Bignell, G. R., Bolli, N.,  
318 Borg, A., Børresen-Dale, A. L., Boyault, S., Burkhardt, B., Butler, A. P., Caldas, C., Davies, H. R., Desmedt, C.,  
319 Eils, R., Eyfjörd, J. E., Foekens, J. A., Greaves, M., Hosoda, F., Hutter, B., Illicic, T., Imbeaud, S., Imielinski, M.,  
320 Jäger, N., Jones, D. T., Jonas, D., Knappskog, S., Koo, M., Lakhani, S. R., López-Otín, C., Martin, S., Munshi,  
321 N. C., Nakamura, H., Northcott, P. A., Pajic, M., Papaemmanuil, E., Paradiso, A., Pearson, J. V., Puente, X. S.,  
322 Raine, K., Ramakrishna, M., Richardson, A. L., Richter, J., Rosenstiel, P., Schlesner, M., Schumacher, T. N., Span,  
323 P. N., Teague, J. W., Totoki, Y., Tutt, A. N., Valdés-Mas, R., Van Buuren, M. M., Van 'T Veer, L., Vincent-Salomon,  
324 A., Waddell, N., Yates, L. R., Zucman-Rossi, J., Andrew Futreal, P., McDermott, U., Lichter, P., Meyerson, M.,  
325 Grimmond, S. M., Siebert, R., Campo, E., Shibata, T., Pfister, S. M., Campbell, P. J., and Stratton, M. R. (2013).  
326 Signatures of mutational processes in human cancer. *Nature*, 500(7463):415–421.
- 327 Astle, W. J., Elding, H., Jiang, T., Allen, D., Ruklisa, D., Mann, A. L., Mead, D., Bouman, H., Riveros-Mckay, F.,  
328 Kostadima, M. A., et al. (2016). The allelic landscape of human blood cell trait variation and links to common  
329 complex disease. *Cell*, 167(5):1415–1429.
- 330 Balding, D. J. and Nichols, R. A. (1995). A method for quantifying differentiation between populations at  
331 multi-allelic loci and its implications for investigating identity and paternity. *Genetica*, 96(1-2):3–12.
- 332 Benjamini, Y., Krieger, A. M., and Yekutieli, D. (2006). Adaptive linear step-up procedures that control the false  
333 discovery rate. *Biometrika*.
- 334 Consortium, . G. P. et al. (2015). A global reference for human genetic variation. *Nature*, 526(7571):68.
- 335 Ebejer, J. L., Duffy, D. L., Van Der Werf, J., Wright, M. J., Montgomery, G., Gillespie, N. A., Hickie, I. B., Martin,  
336 N. G., and Medland, S. E. (2013). Genome-wide association study of inattention and hyperactivity-impulsivity  
337 measured as quantitative traits. *Twin Research and Human Genetics*.
- 338 Ellinghaus, D., Jostins, L., Spain, S. L., Cortes, A., Bethune, J., Han, B., Park, Y. R., Raychaudhuri, S., Pouget, J. G.,  
339 Hübenal, M., et al. (2016). Analysis of five chronic inflammatory diseases identifies 27 new associations and  
340 highlights disease-specific patterns at shared loci. *Nature genetics*, 48(5):510.
- 341 Gao, X. R., Huang, H., Nannini, D. R., Fan, F., and Kim, H. (2018). Genome-wide association analyses identify new  
342 loci influencing intraocular pressure. *Human molecular genetics*, 27(12):2205–2213.
- 343 Harris, K. (2015). Evidence for recent, population-specific evolution of the human mutation rate. *Proceedings of*  
344 *the National Academy of Sciences*, 112(11):3439–3444.

- 345 Harris, K. and Pritchard, J. K. (2017). Rapid evolution of the human mutation spectrum. *eLife*, 6.
- 346 Herold, C., Hooli, B. V., Mullin, K., Liu, T., Roehr, J. T., Mattheisen, M., Parrado, A. R., Bertram, L., Lange, C., and  
347 Tanzi, R. E. (2016). Family-based association analyses of imputed genotypes reveal genome-wide significant  
348 association of alzheimer's disease with *osbpl6*, *ptprg*, and *pdcl3*. *Molecular psychiatry*, 21(11):1608.
- 349 International HapMap Consortium (2005). A haplotype map of the human genome. *Nature*, 437(7063):1299–320.
- 350 Kraja, A. T., Vaidya, D., Pankow, J. S., Goodarzi, M. O., Assimes, T. L., Kullo, I. J., Sovio, U., Mathias, R. A., Sun, Y. V.,  
351 Franceschini, N., Absher, D., Li, G., Zhang, Q., Feitosa, M. F., Glazer, N. L., Haritunians, T., Hartikainen, A. L.,  
352 Knowles, J. W., North, K. E., Iribarren, C., Kral, B., Yanek, L., O'Reilly, P. F., McCarthy, M. I., Jaquish, C., Couper,  
353 D. J., Chakravarti, A., Psaty, B. M., Becker, L. C., Province, M. A., Boerwinkle, E., Quertermous, T., Palotie, L.,  
354 Jarvelin, M. R., Becker, D. M., Kardia, S. L., Rotter, J. I., Chen, Y. D. I., and Borecki, I. B. (2011). A bivariate  
355 genome-wide approach to metabolic syndrome: STAMPEED Consortium. *Diabetes*.
- 356 Lan, T., Lin, H., Zhu, W., Laurent, T. C. A. M., Yang, M., Liu, X., Wang, J., Wang, J., Yang, H., Xu, X., and Guo, X. (2017).  
357 Deep whole-genome sequencing of 90 han chinese genomes. *GigaScience*, 6(9):gix067.
- 358 Lek, M., Karczewski, K. J., Minikel, E. V., Samocha, K. E., Banks, E., Fennell, T., O'Donnell-Luria, A. H., Ware, J. S.,  
359 Hill, A. J., Cummings, B. B., Tukiainen, T., Birnbaum, D. P., Kosmicki, J. A., Duncan, L. E., Estrada, K., Zhao, F.,  
360 Zou, J., Pierce-Hoffman, E., Berghout, J., Cooper, D. N., Deflaux, N., DePristo, M., Do, R., Flannick, J., Fromer,  
361 M., Gauthier, L., Goldstein, J., Gupta, N., Howrigan, D., Kiezun, A., Kurki, M. I., Moonshine, A. L., Natarajan,  
362 P., Orozco, L., Peloso, G. M., Poplin, R., Rivas, M. A., Ruano-Rubio, V., Rose, S. A., Ruderfer, D. M., Shakir, K.,  
363 Stenson, P. D., Stevens, C., Thomas, B. P., Tiao, G., Tusie-Luna, M. T., Weisburd, B., Won, H. H., Yu, D., Altshuler,  
364 D. M., Ardissino, D., Boehnke, M., Danesh, J., Donnelly, S., Elosua, R., Florez, J. C., Gabriel, S. B., Getz, G., Glatt,  
365 S. J., Hultman, C. M., Kathiresan, S., Laakso, M., McCarroll, S., McCarthy, M. I., McGovern, D., McPherson, R.,  
366 Neale, B. M., Palotie, A., Purcell, S. M., Saleheen, D., Scharf, J. M., Sklar, P., Sullivan, P. F., Tuomilehto, J., Tsuang,  
367 M. T., Watkins, H. C., Wilson, J. G., Daly, M. J., and MacArthur, D. G. (2016). Analysis of protein-coding genetic  
368 variation in 60,706 humans. *Nature*, 536(7616):285–291.
- 369 López-Mejías, R., Carmona, F. D., Castañeda, S., Genre, F., Remuzgo-Martínez, S., Sevilla-Perez, B., Ortego-  
370 Centeno, N., Llorca, J., Ubilla, B., Mijares, V., et al. (2017). A genome-wide association study suggests the *hla*  
371 *class ii* region as the major susceptibility locus for iga vasculitis. *Scientific reports*, 7(1):5088.
- 372 Lutz, S. M., Cho, M. H., Young, K., Hersh, C. P., Castaldi, P. J., McDonald, M.-L., Regan, E., Mattheisen, M., DeMeo,  
373 D. L., Parker, M., et al. (2015). A genome-wide association study identifies risk loci for spirometric measures  
374 among smokers of european and african ancestry. *BMC genetics*, 16(1):138.
- 375 Mallick, S., Li, H., Lipson, M., Mathieson, I., Gymrek, M., Racimo, F., Zhao, M., Chennagiri, N., Nordenfelt, S.,  
376 Tandon, A., Skoglund, P., Lazaridis, I., Sankararaman, S., Fu, Q., Rohland, N., Renaud, G., Erlich, Y., Willems, T.,  
377 Gallo, C., Spence, J. P., Song, Y. S., Poletti, G., Balloux, F., Van Driem, G., De Knijff, P., Romero, I. G., Jha, A. R.,  
378 Behar, D. M., Bravi, C. M., Capelli, C., Hervig, T., Moreno-Estrada, A., Posukh, O. L., Balanovska, E., Balanovsky,  
379 O., Karachanak-Yankova, S., Sahakyan, H., Toncheva, D., Yepiskoposyan, L., Tyler-Smith, C., Xue, Y., Abdullah,  
380 M. S., Ruiz-Linares, A., Beall, C. M., Di Rienzo, A., Jeong, C., Starikovskaya, E. B., Metspalu, E., Parik, J., Villems,  
381 R., Henn, B. M., Hodoglugil, U., Mahley, R., Sajantila, A., Stamatoyannopoulos, G., Wee, J. T., Khusainova, R.,  
382 Khusnutdinova, E., Litvinov, S., Ayodo, G., Comas, D., Hammer, M. F., Kivisild, T., Klitz, W., Winkler, C. A., Labuda,  
383 D., Bamshad, M., Jorde, L. B., Tishkoff, S. A., Watkins, W. S., Metspalu, M., Dryomov, S., Sukernik, R., Singh, L.,  
384 Thangaraj, K., Paäbo, S., Kelso, J., Patterson, N., and Reich, D. (2016). The Simons Genome Diversity Project:  
385 300 genomes from 142 diverse populations. *Nature*, 538(7624):201–206.
- 386 Mandage, R., Telford, M., Rodríguez, J. A., Farré, X., Layouni, H., Marigorta, U. M., Cundiff, C., Heredia-Genestar,  
387 J. M., Navarro, A., and Santpere, G. (2017). Genetic factors affecting EBV copy number in lymphoblastoid cell  
388 lines derived from the 1000 Genome Project samples. *PLoS ONE*.
- 389 Mathieson, I. and Reich, D. (2017). Differences in the rare variant spectrum among human populations. *PLoS*  
390 *Genetics*, 13(2).
- 391 McCarthy, S., Das, S., Kretzschmar, W., Delaneau, O., Wood, A. R., Teumer, A., Kang, H. M., Fuchsberger, C.,  
392 Danecek, P., Sharp, K., et al. (2016). A reference panel of 64,976 haplotypes for genotype imputation. *Nature*  
393 *genetics*, 48(10):1279.
- 394 Minoche, A. E., Dohm, J. C., and Himmelbauer, H. (2011). Evaluation of genomic high-throughput sequencing  
395 data generated on Illumina HiSeq and Genome Analyzer systems. *Genome Biology*, 12(11).

- 396 Nagy, R., Boutin, T. S., Marten, J., Huffman, J. E., Kerr, S. M., Campbell, A., Evenden, L., Gibson, J., Amador, C.,  
397 Howard, D. M., et al. (2017). Exploration of haplotype research consortium imputation for genome-wide  
398 association studies in 20,032 generation scotland participants. *Genome medicine*, 9(1):23.
- 399 Nishida, N., Sugiyama, M., Sawai, H., Nishina, S., Sakai, A., Ohashi, J., Khor, S.-S., Kakisaka, K., Tsuchiura, T., Hino,  
400 K., et al. (2018). Key hla-drb1-dqb1 haplotypes and role of the btl2 gene for response to a hepatitis b vaccine.  
401 *Hepatology*, 68(3):848–858.
- 402 Park, S. L., Carmella, S. G., Chen, M., Patel, Y., Stram, D. O., Haiman, C. A., Le Marchand, L., and Hecht, S. S. (2015).  
403 Mercapturic acids derived from the toxicants acrolein and crotonaldehyde in the urine of cigarette smokers  
404 from five ethnic groups with differing risks for lung cancer. *PLoS One*, 10(6):e0124841.
- 405 Pfeifer, G. P., Denissenko, M. F., Olivier, M., Tretyakova, N., Hecht, S. S., and Hainaut, P. (2002). Tobacco smoke  
406 carcinogens, DNA damage and p53 mutations in smoking-associated cancers. *Oncogene*, 21-48(6):7435–7451.
- 407 Pleasance, E. D., Stephens, P. J., O'Meara, S., McBride, D. J., Meynert, A., Jones, D., Lin, M. L., Beare, D., Lau,  
408 K. W., Greenman, C., Varela, I., Nik-Zainal, S., Davies, H. R., Ordóñez, G. R., Mudie, L. J., Latimer, C., Edkins, S.,  
409 Stebbings, L., Chen, L., Jia, M., Leroy, C., Marshall, J., Menzies, A., Butler, A., Teague, J. W., Mangion, J., Sun, Y. A.,  
410 McLaughlin, S. F., Peckham, H. E., Tsung, E. F., Costa, G. L., Lee, C. C., Minna, J. D., Gazdar, A., Birney, E., Rhodes,  
411 M. D., McKernan, K. J., Stratton, M. R., Futreal, P. A., and Campbell, P. J. (2010). A small-cell lung cancer genome  
412 with complex signatures of tobacco exposure. *Nature*, 463(7278):184–190.
- 413 Pritchard, J. K., Stephens, M., and Donnelly, P. (2000). Inference of population structure using multilocus genotype  
414 data. *Genetics*, 155(2):945–959.
- 415 Shiraishi, Y., Tremmel, G., Miyano, S., and Stephens, M. (2015). A Simple Model-Based Approach to Inferring and  
416 Visualizing Cancer Mutation Signatures. *PLoS Genetics*, 11(12).
- 417 Song, M., Hao, W., and Storey, J. D. (2015). Testing for genetic associations in arbitrarily structured populations.  
418 *Nature genetics*, 47(5):550.
- 419 Spracklen, C. N., Chen, P., Kim, Y. J., Wang, X., Cai, H., Li, S., Long, J., Wu, Y., Wang, Y. X., Takeuchi, F., et al. (2017).  
420 Association analyses of east asian individuals and trans-ancestry analyses with european individuals reveal  
421 new loci associated with cholesterol and triglyceride levels. *Human molecular genetics*, 26(9):1770–1784.
- 422 Suhre, K., Arnold, M., Bhagwat, A. M., Cotton, R. J., Engelke, R., Raffler, J., Sarwath, H., Thareja, G., Wahl, A.,  
423 DeLisle, R. K., et al. (2017). Connecting genetic risk to disease end points through the human blood plasma  
424 proteome. *Nature communications*, 8:14357.
- 425 Tian, C., Hromatka, B. S., Kiefer, A. K., Eriksson, N., Noble, S. M., Tung, J. Y., and Hinds, D. A. (2017). Genome-wide  
426 association and hla region fine-mapping studies identify susceptibility loci for multiple common infections.  
427 *Nature communications*, 8(1):599.
- 428 van Dijk, E. L., Auger, H., Jaszczyszyn, Y., and Thermes, C. (2014). Ten years of next-generation sequencing  
429 technology. *Trends in Genetics*, 30(9):418–426.
- 430 Xu, J., Mo, Z., Ye, D., Wang, M., Liu, F., Jin, G., Xu, C., Wang, X., Shao, Q., Chen, Z., et al. (2012). Genome-wide  
431 association study in chinese men identifies two new prostate cancer risk loci at 9q31. 2 and 19q13. 4. *Nature*  
432 *genetics*, 44(11):1231.
- 433 Yucesoy, B., Kaufman, K. M., Lummus, Z. L., Weirauch, M. T., Zhang, G., Cartier, A., Boulet, L.-P., Sastre, J.,  
434 Quirce, S., Tarlo, S. M., et al. (2015). Genome-wide association study identifies novel loci associated with  
435 diisocyanate-induced occupational asthma. *Toxicological Sciences*, 146(1):192–201.

436 **Supplementary Figures**

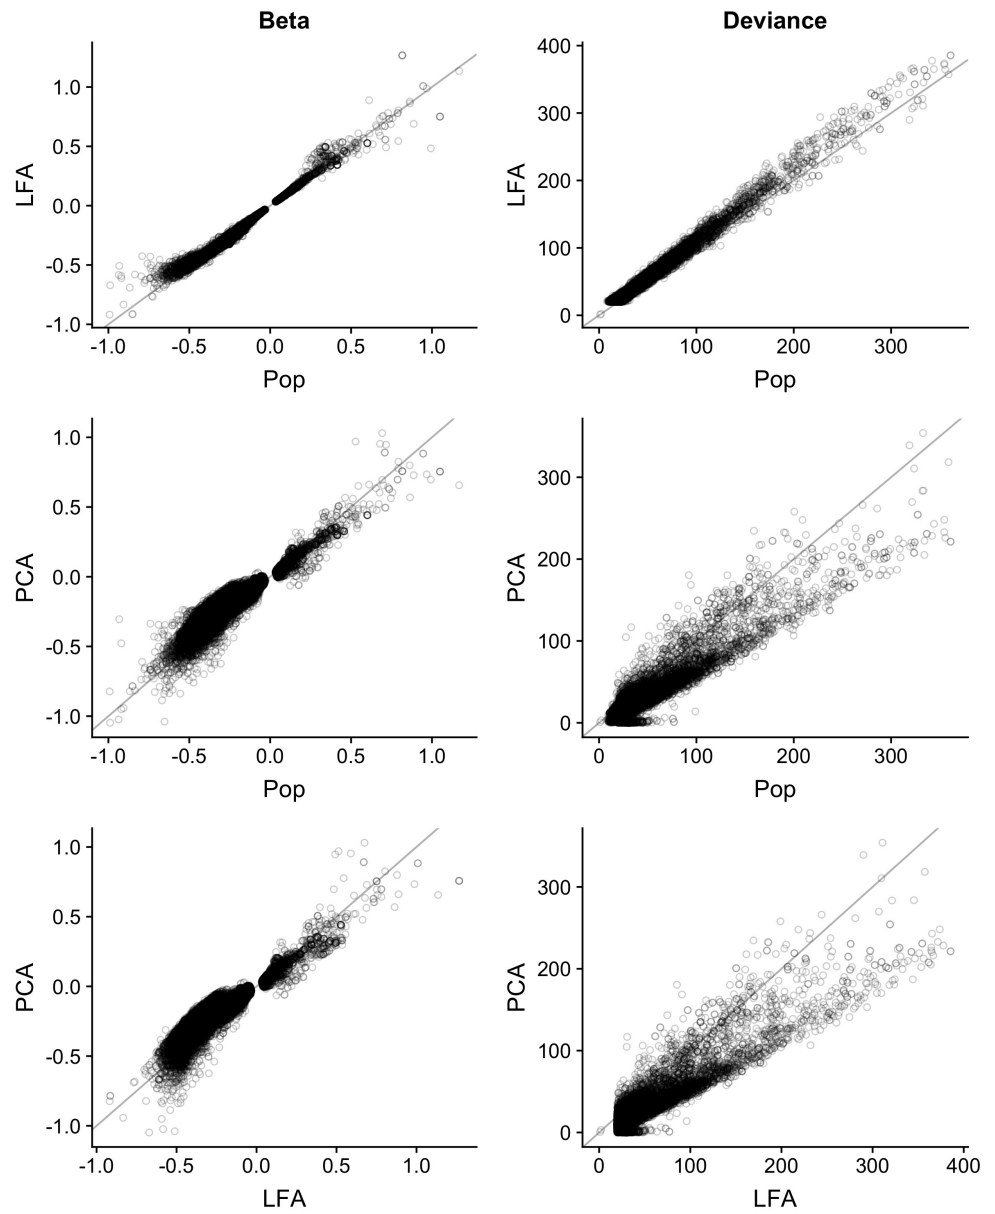

**Figure S1.** Comparison of three logistic regression models for testing association to  $Q$ . These methods model each genotype as a logistic function using principal components (PC), Population membership (Pop) or LFA as an offset. In these plots we are comparing the deviance from the null model in the 15,270 variants identified using the LFA model.

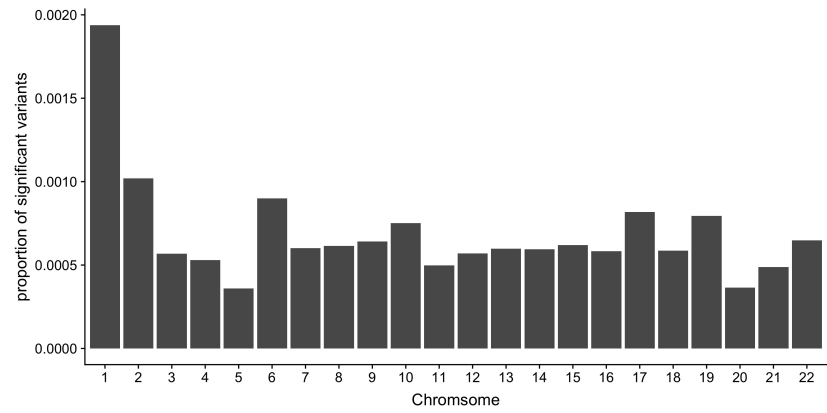

**Figure S2.** The proportion of  $Q$ -associated variants per chromosome.

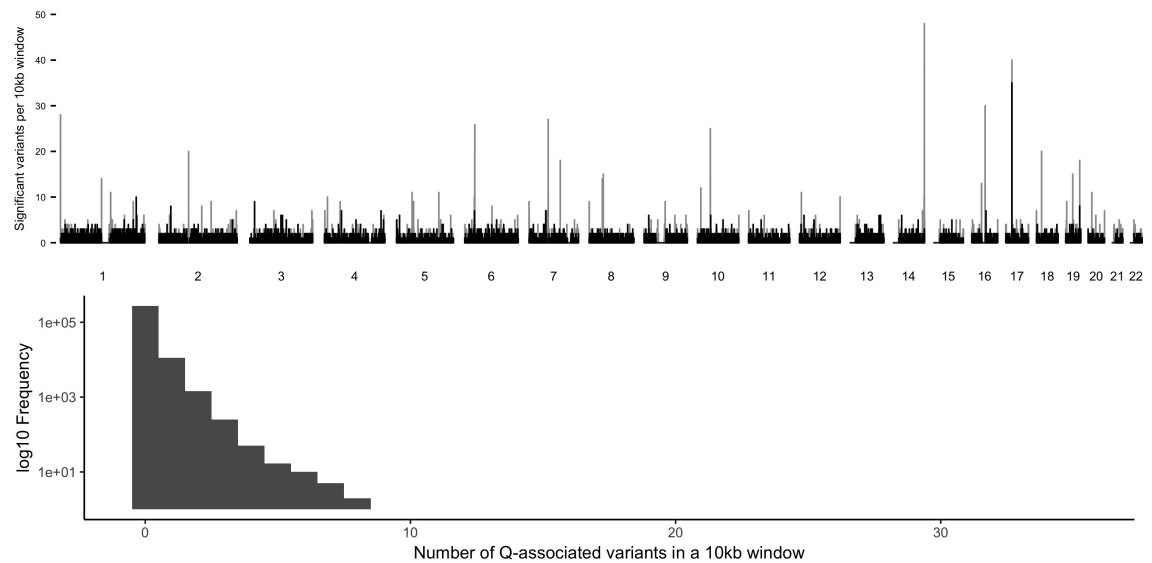

**Figure S3.** The number of  $Q$ -associated variants per 10kb window across the genome. Grey bars indicate regions within and black bars indicate regions outside the 1000 Genomes Project strict mask. One region not flagged by the 1000 Genomes Project strict mask in chromosome 17 has more than 10 variants per window.

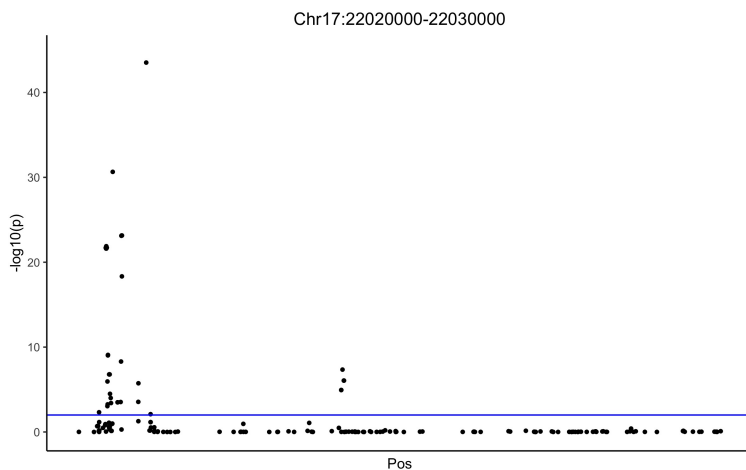

**Figure S4.** Manhattan plot of the  $-\log_{10}(p)$  values for the reverse GWAS logistic regression analysis for the 10kb window with the most  $Q$ -associated variants per 10kb across the genome.



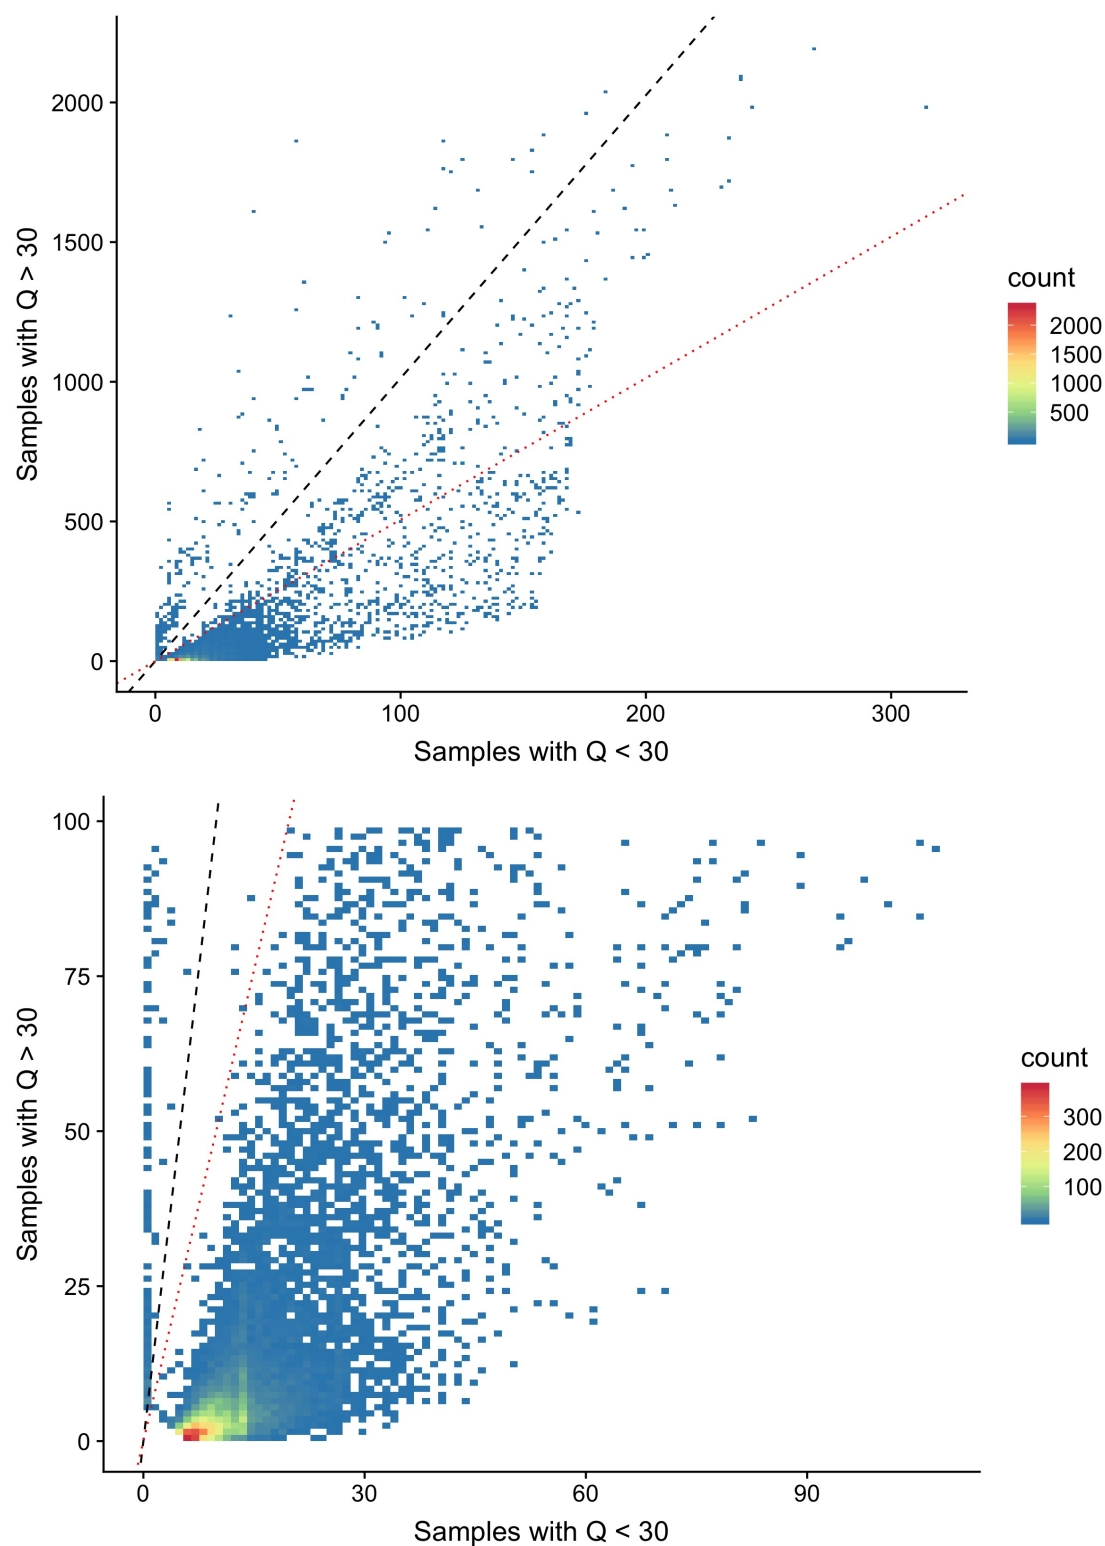

**Figure S5.** Site frequency spectrum plot comparing the allele frequency difference between individuals with low- and high- $Q$ . The black dashed lines indicates equal allele frequencies while the red dotted line for variants twice as frequent in individuals with  $Q$  scores below 30. Two clusters of are visible, where the majority (92.7%) of the  $Q$ -associated variants are more than twice as frequent in individuals with low- $Q$ .

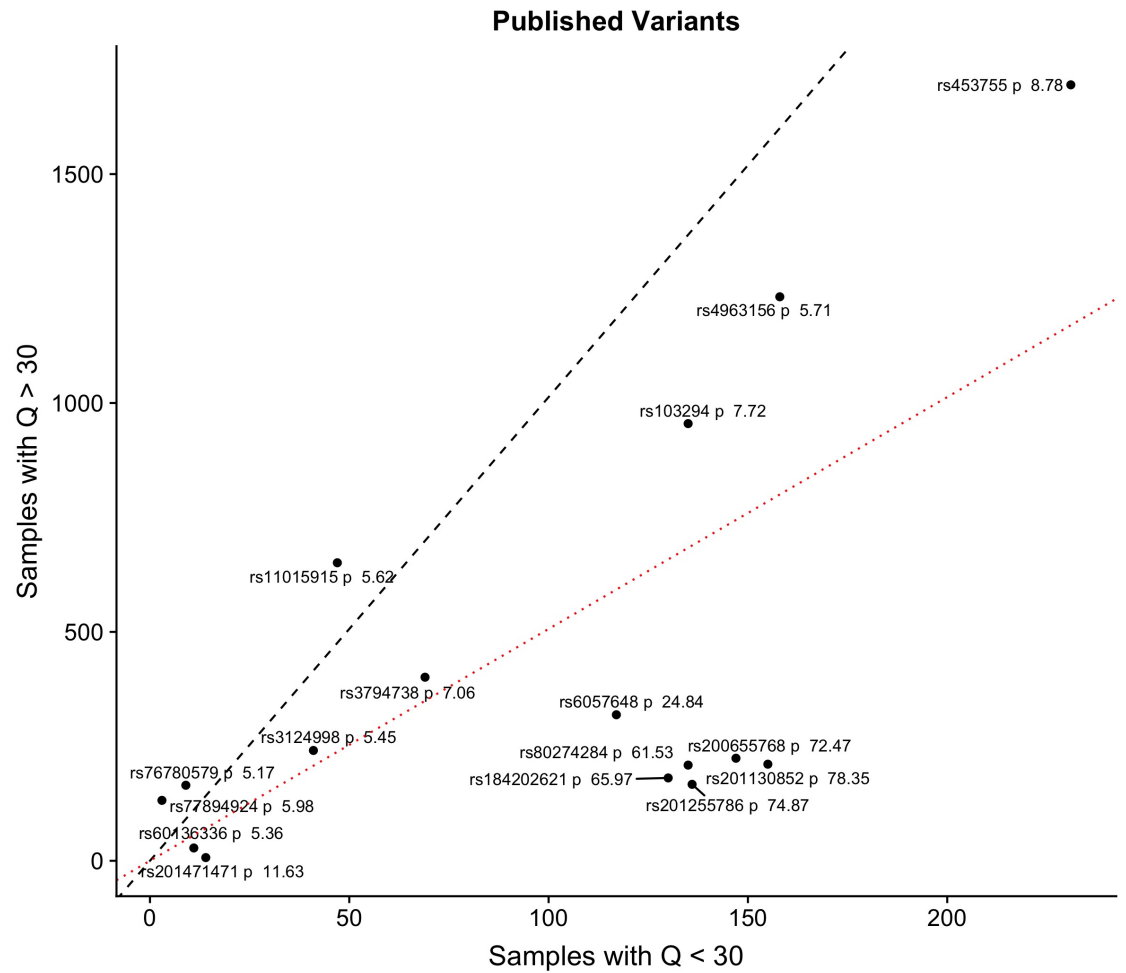

**Figure S6.** Site frequency spectrum plot comparing the frequency of  $Q$ -associated variants identified in publications, for individuals with  $Q$  scores above and below 30. The black dashed lines indicates equal allele frequencies while the red dotted line for variants twice as frequent in individuals with  $Q$  scores below 30. Each of the rsIDs of the variants are labelled for clarity.

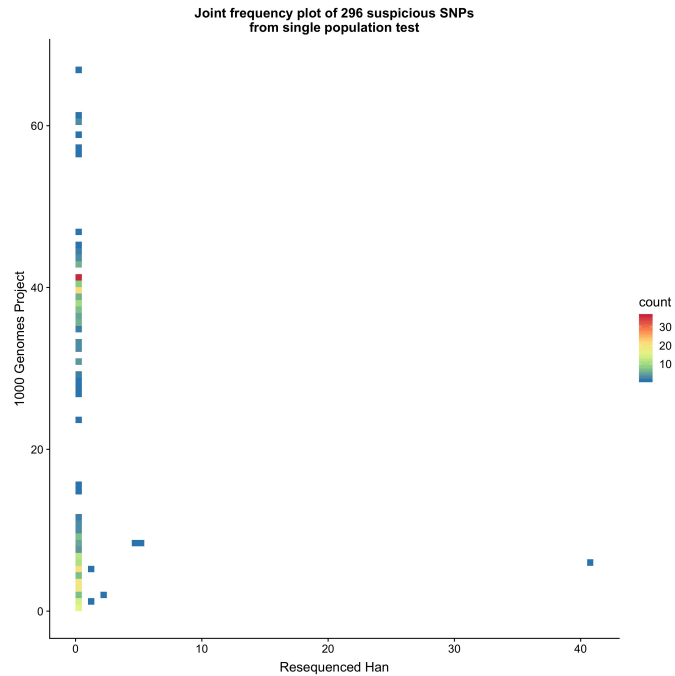

**Figure S7.** Site frequency spectrum plot comparing the original 1000 Genomes Project data to the high depth resequence data for variants that, in the 1000 Genomes Project, are both associated with  $Q$  and polymorphic in the 83 individuals that were resequenced. Among the 296 variants associated with  $Q$  in the single population tests within the 1000 Genomes Project CHB and CHS, 6 are present in the resequenced data (*Lan et al., 2017*).

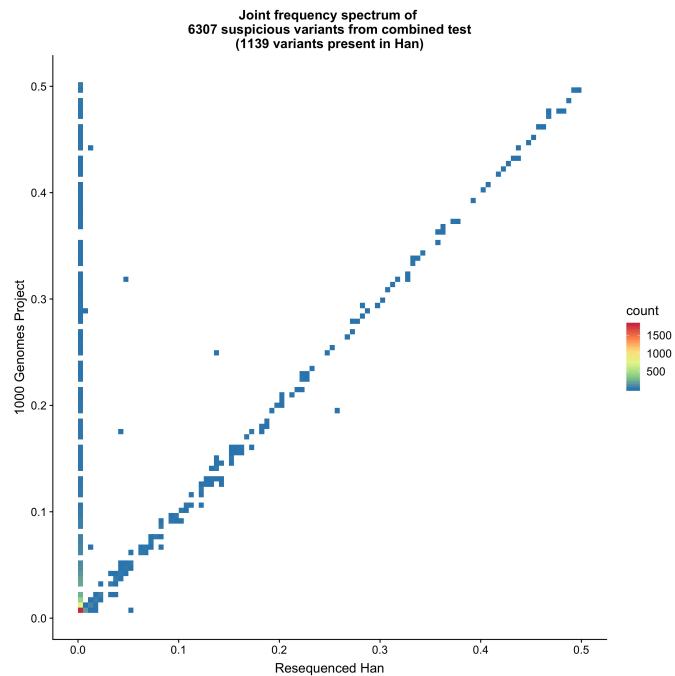

**Figure S8.** Site frequency spectrum plot comparing the original 1000 Genomes Project data to the high depth resequence data for variants that, in the 1000 Genomes Project, are both associated with  $Q$  and polymorphic in the 83 individuals that were resequenced. Among the 6,307 variants associated with  $Q$  in the GCAT model including all populations, 1,139 are present in the high depth resequenced individuals.

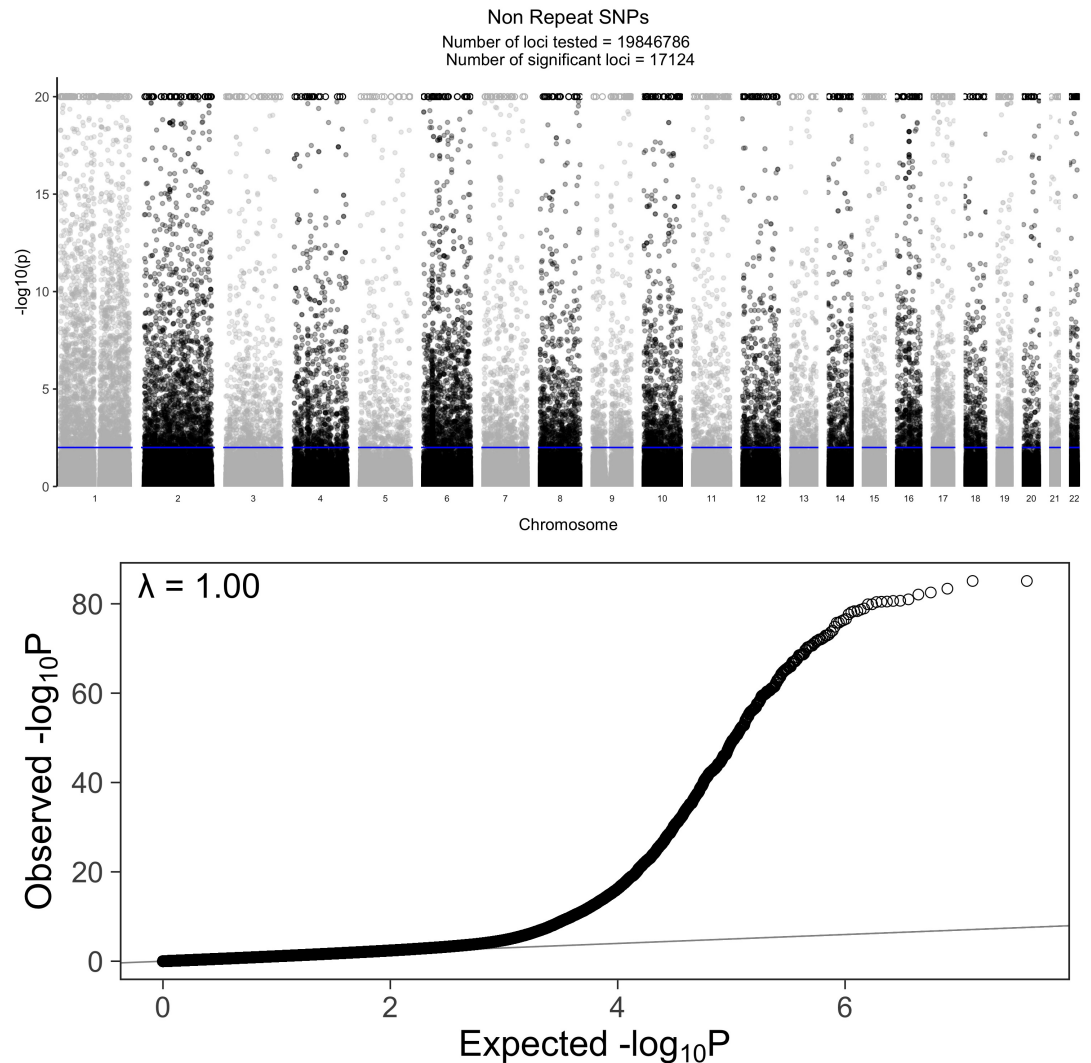

**Figure S9.** Association of SNPs in non-repetitive regions with  $Q$ . **A** Manhattan plot of the  $-\log_{10}(p)$  values for the reverse GWAS logistic regression analysis for SNPs in non repetitive regions. There are 15,018 SNPs that reach  $p$  values greater than  $p < 0.01$  after performing a two-stage Benjamini and Hochberg FDR adjustment. The circles (o) are variants that reached values greater than 20, for clarity we implemented hard ceiling at 20. **B** QQ plot of the unadjusted  $p$  values for the reverse GWAS logistic regression analysis for SNPs in non repetitive regions.

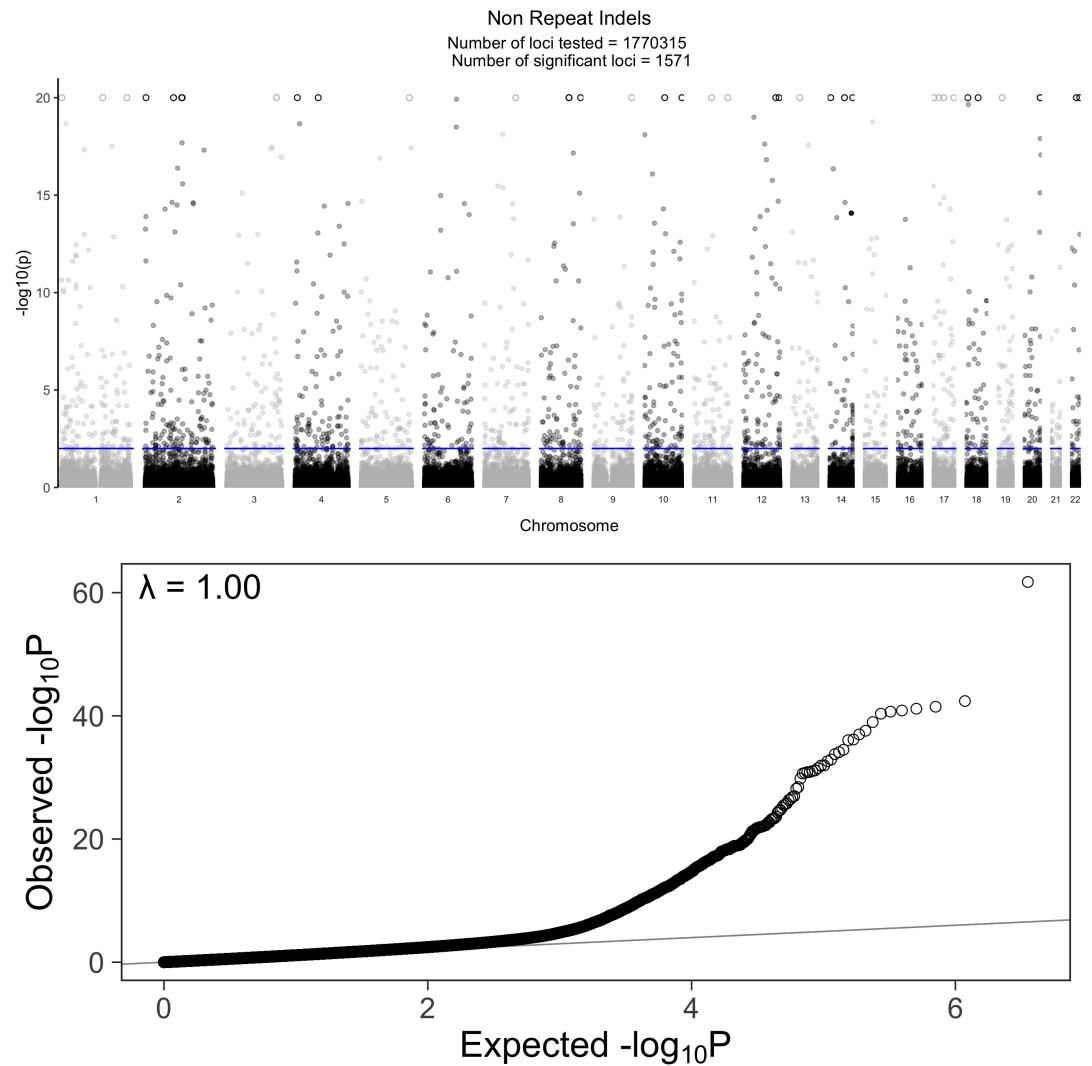

**Figure S10.** Association of indels in non-repetitive regions with  $Q$ . **A** Manhattan plot of the  $-\log_{10}(p)$  values for the reverse GWAS logistic regression analysis for INDELS in non repetitive regions. There are 2,121 INDELS that reach  $p$  values greater than  $p < 0.01$  after performing a two-stage Benjamini and Hochberg FDR adjustment. The circles (o) are variants that reached values greater than 20, for clarity we implemented hard ceiling at 20. **B** QQ plot of the unadjusted  $p$  values for the reverse GWAS logistic regression analysis for INDELS in non repetitive regions.

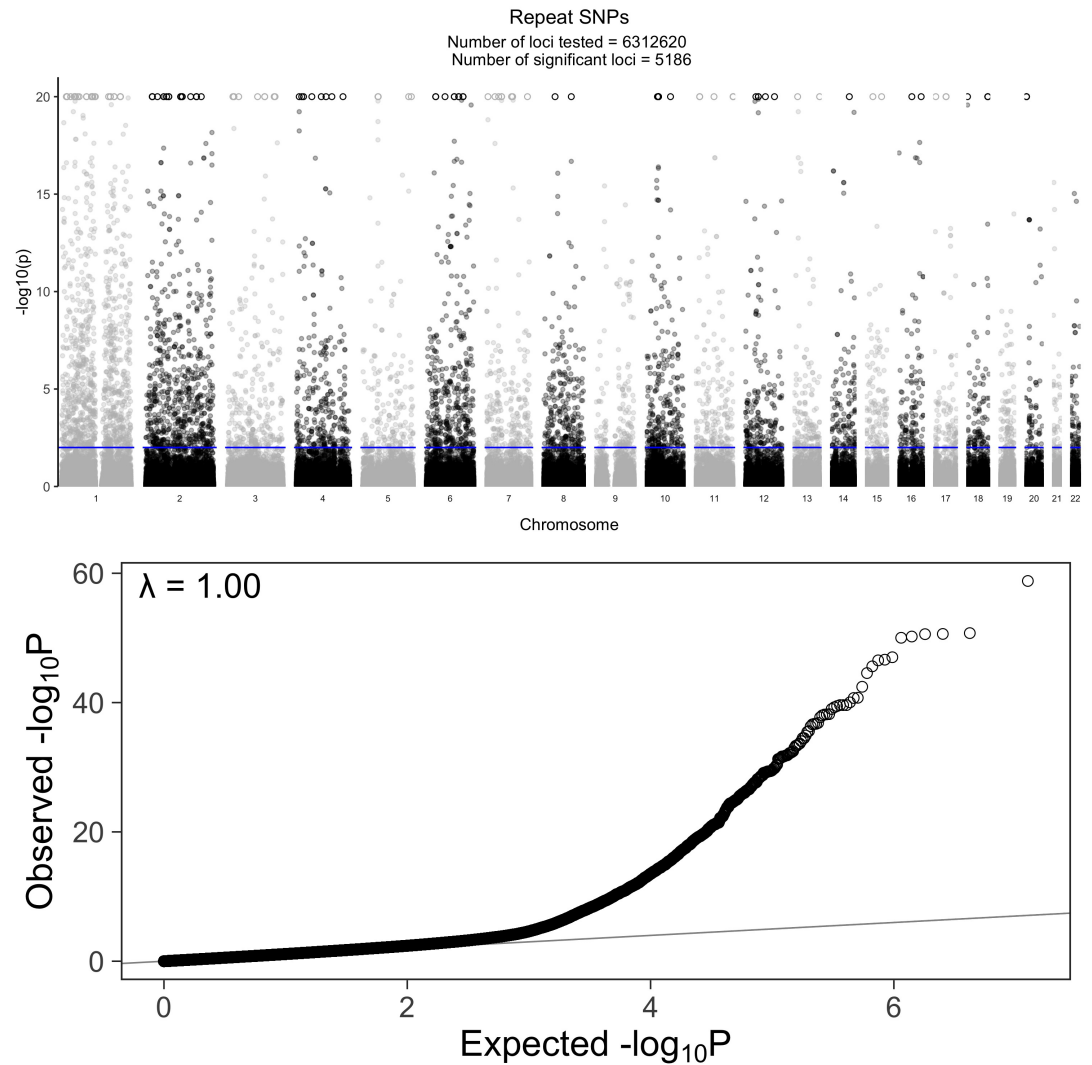

**Figure S11.** Association of SNPs in repetitive regions with  $Q$ . **A** Manhattan plot of the  $-\log_{10}(p)$  values for the reverse GWAS logistic regression analysis for SNPs in repetitive regions. There are 4,405 SNPs that reach  $p$  values greater than  $p < 0.01$  after performing a two-stage Benjamini and Hochberg FDR adjustment. The circles (o) are variants that reached values greater than 20, for clarity we implemented hard ceiling at 20. **B** QQ plot of the unadjusted  $p$  values for the reverse GWAS logistic regression analysis for SNPs in repetitive regions.

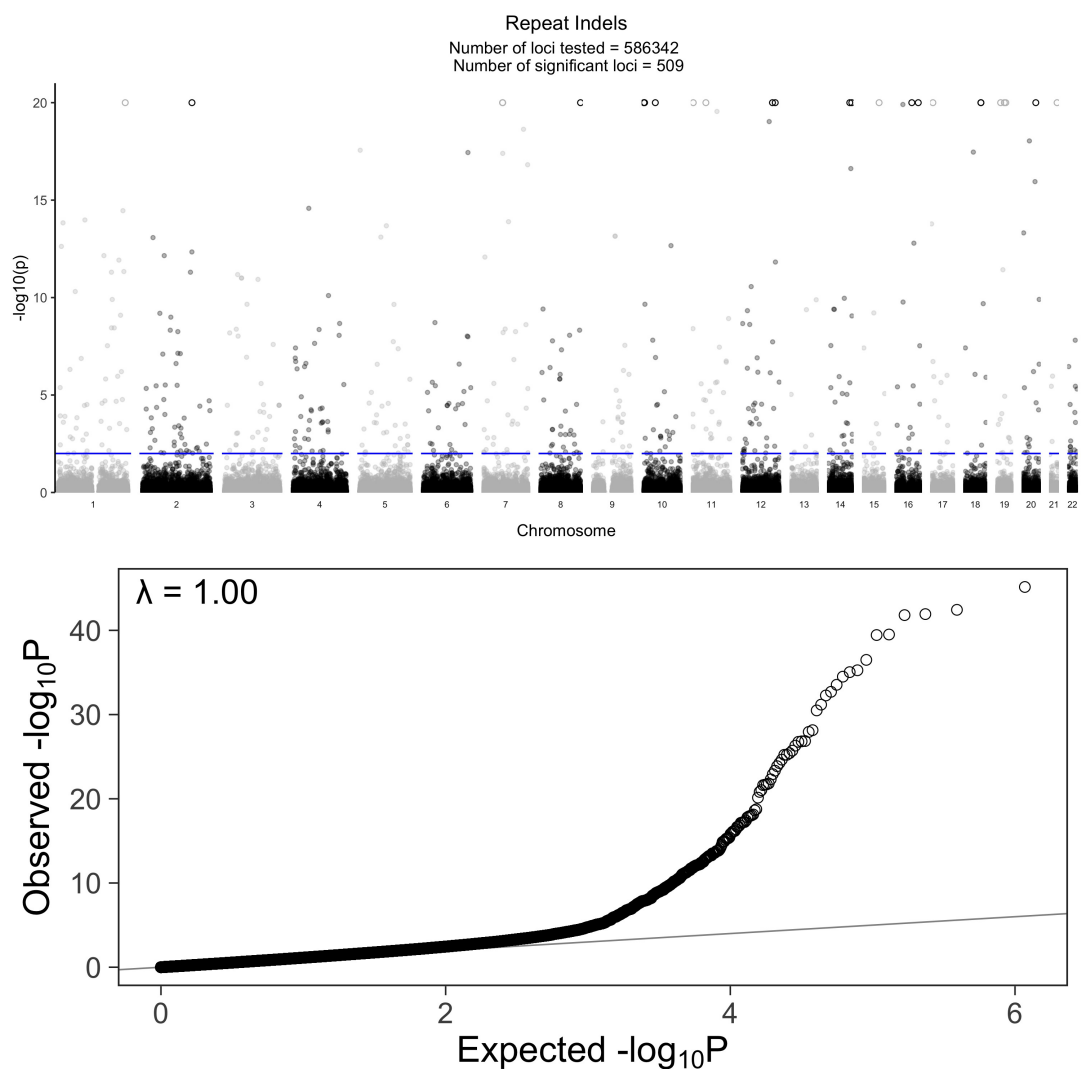

**Figure S12.** Association of indels in repetitive regions with  $Q$ . **A** Manhattan plot of the  $-\log_{10}(p)$  values for the reverse GWAS logistic regression analysis for INDELS in repetitive regions. There are 642 INDELS that reach  $p$  values greater than  $p < 0.01$  after performing a two-stage Benjamini and Hochberg FDR adjustment. The circles (o) are variants that reached values greater than 20, for clarity we implemented hard ceiling at 20. **B** QQ plot of the unadjusted  $p$  values for the reverse GWAS logistic regression analysis for INDELS in repetitive regions.

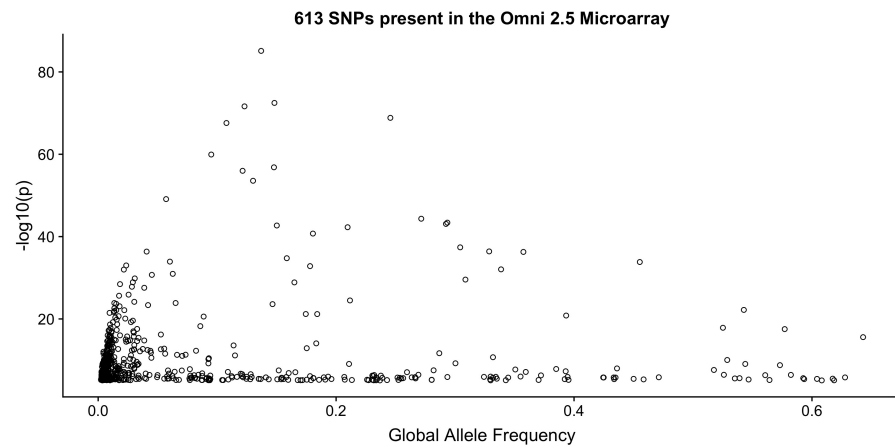

**Figure S13.** Estimated frequency and association strength of  $Q$ -associated variants present on Illumina's Omni 2.5 chip. Variants highly associated to  $Q$  tend to have low global allele frequencies.

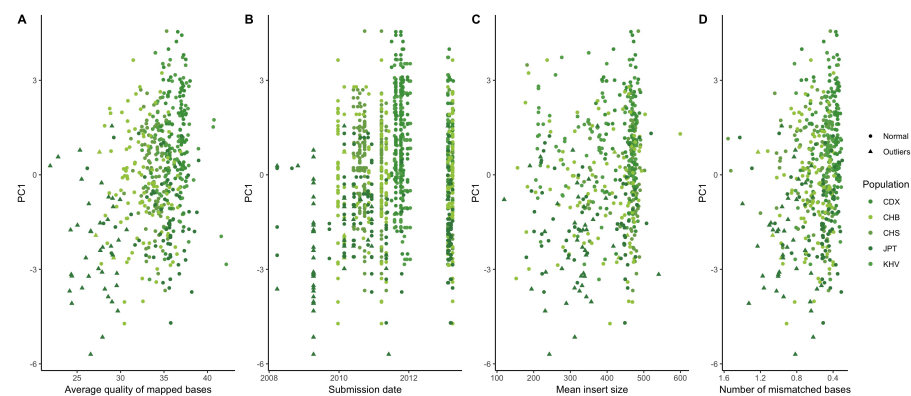

**Figure S14.** Sequencing metrics against the prevalence of the  $*AC \rightarrow *CC$  mutational signature in 1000 Genomes Project. The average quality per mapped bases  $Q$  per individual shows some clustering with individuals with low-quality data showing elevated rates of the signature.

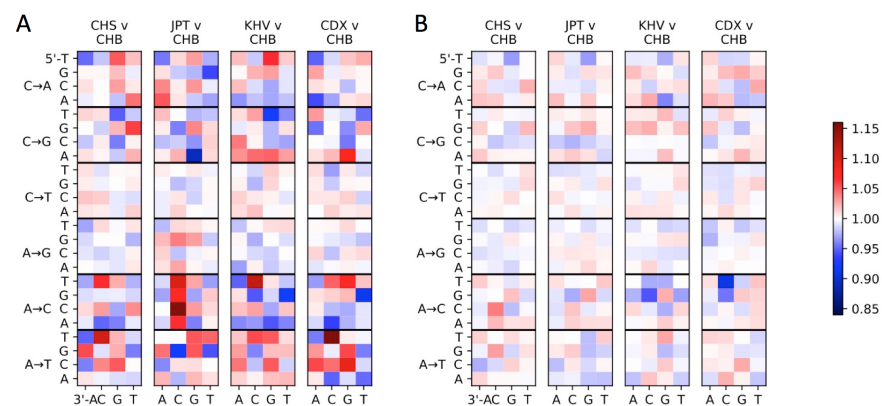

**Figure S15.** Comparing mutational signatures after removing  $Q$ -associated variants and after removing individuals with low  $Q$ . **A** The  $*AC \rightarrow *CC$  mutational signature in JPT remains despite removing variants associated to quality. **B** Removing individuals with average quality per mapped bases  $Q$  below a threshold of 30 removes the mutational signature completely.
